# Supplementary material for: Identification and Validation of Genetic Variations in Transgenic Chinese Cabbage Plants (Brassica rapa ssp. pekinensis) by Next-Generation Sequencing
Source: MDPI journal article supplement (doi:10.3390/genes12050621), 2021-04-22
Supplement: s1 [file s1]

**Table S1.** List of primer sets for the exonic SNP candidates identified in transgenic Chinese cabbage plants.

| Name | Target gene<br>with variation | Primer | Sequence (5'→3')              | Expected<br>product size |
|------|-------------------------------|--------|-------------------------------|--------------------------|
| K3   | CT001_A03120110               | F      | GAG GAA GTA GCA ATC TGT       | 183 bp                   |
|      |                               | R      | GAA CTC GTG ACA TCA ATG       |                          |
| G1   | CT001_A03403810               | F      | GCT GAT TCA GGT TAT CTC TCG   | 180 bp                   |
|      |                               | R      | CCA TAA CCA TAC AGA CTC GC    |                          |
| T1   | CT001_A03130860               | F      | CTT CTA TCA CCA GAA CTA G     | 180 bp                   |
|      |                               | R      | CGG GTA GTA ATG ATC CAG       |                          |
| T3   | CT001_A06415940               | F      | CTC TCT GCT GTT GGG GTT G     | 144 bp                   |
|      |                               | R      | GCC ATA TAG CGA GGG ATT GC    |                          |
| H1   | CT001_A01012460               | F      | CTG GTA CTT TCA GGT CTT AG    | 227 bp                   |
|      |                               | R      | GAT AGA GGA ACA TGC TCA TC    |                          |
| H2   | CT001_A06202820               | F      | GGA AGC CAA ATC TAT CAA TCT C | 190 bp                   |
|      |                               | R      | TGT CTC TCC TCG GTG TCG T     |                          |
| S1   | CT001_A03085970               | F      | GAT GAA GAT GGC TCG TGG TA    | 120 bp                   |
|      |                               | R      | GAA ACA GAT TCT GAT GGT GG    |                          |
| S2   | CT001_A03117730               | F      | AGA ATC AAT GAG CTG GAG C     | 105 bp                   |
|      |                               | R      | CGG TGT TTT GGG TTC ATC GC    |                          |
| S3   | CT001_A03119840               | F      | GCT ATG AAG GCT CGC AAG GA    | 135 bp                   |
|      |                               | R      | GAT CTG TTC GTC GCT CAG C     |                          |
| S4   | CT001_A07256220               | F      | CGA GAA GGA CAG GTT GAT TG    | 138 bp                   |
|      |                               | R      | GAT TCA GTT GGC TGT TGT GG    |                          |
| S5   | CT001_A07260320               | F      | CCT ACT CGT TAT TCT GAG C     | 165 bp                   |
|      |                               | R      | CAC CTT TGT AGT TTC ATT CG    |                          |
| S6   | CT001_A10358000               | F      | GGC TTT AAT CTC TTC AACA TC   | 157 bp                   |
|      |                               | R      | TCA CAA CCA ACT TCC AAC CC    |                          |

**Table S2.** Raw and trimmed resequencing data of the non-transgenic and transgenic Chinese cabbage plants

|                | Name   | Total raw reads | Total raw bases | Trimmed reads | Trimmed bases |
|----------------|--------|-----------------|-----------------|---------------|---------------|
| Control        | CT001  | 34,332,178      | 5,163,324,609   | 31,702,960    | 4,321,143,630 |
| T <sub>1</sub> | IGA7   | 34,639,750      | 5,209,327,231   | 31,625,346    | 4,331,305,874 |
| T <sub>3</sub> | IGA743 | 34,181,022      | 5,140,452,962   | 31,337,864    | 4,278,608,798 |

**Table S3.** Summary statistics for mapping evaluation of non-transgenic and transgenic Chinese cabbage plants.

|                | Name   | Total reads count | Total reads length (bp) | Mapped reads count | Mapped reads length (bp) | Properly mapped paired reads | Average depth | Genome coverage (%) |
|----------------|--------|-------------------|-------------------------|--------------------|--------------------------|------------------------------|---------------|---------------------|
| Control        | CT001  | 23,954,084        | 3,066,896,132           | 20,672,865         | 2,460,619,929            | 15,708,992                   | 11.20×        | 98.00               |
| T <sub>1</sub> | IGA7   | 24,194,706        | 3,131,596,634           | 20,947,186         | 2,520,494,387            | 15,726,260                   | 11.47×        | 98.02               |
| T <sub>3</sub> | IGA743 | 23,672,400        | 3,032,614,568           | 20,369,533         | 2,435,187,250            | 15,307,950                   | 11.08×        | 97.45               |
